# Supplementary material for: TDP-43 and FUS mislocalization in VCP mutant motor neurons is reversed by pharmacological inhibition of the VCP D2 ATPase domain
Source: PubMed Central journal article supplement (PMC8361416; doi:10.1093/braincomms/fcab166), 2021-08-06
Supplement: fcab166_supplementary_data.pdf [file fcab166_supplementary_data.pdf]

## Supplementary Information

| IPSC cell line | Mutation | Age of the donor | Age at disease onset | Sex of the donor |
|----------------|----------|------------------|----------------------|------------------|
| CTRL1          | None     | 78               | n/a                  | Male             |
| CTRL2          | None     | 64               | n/a                  | Male             |
| CTRL3          | None     | unknown          | n/a                  | Female           |
| MUT1           | R191Q    | 42               | 36                   | Male             |
| MUT2           | R191Q    | 42               | 36                   | Male             |
| MUT3           | R155C    | 43               | 40                   | Female           |
| MUT4           | R155C    | 43               | 40                   | Female           |

**Supplementary Table 1.** *Details of the iPSC cell lines used in the study.*

**A**

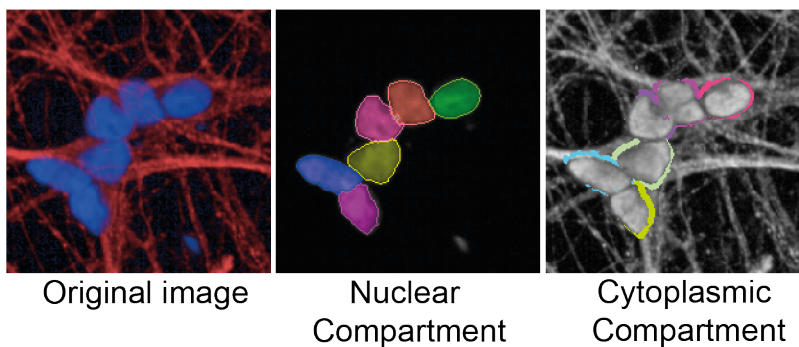

**B**

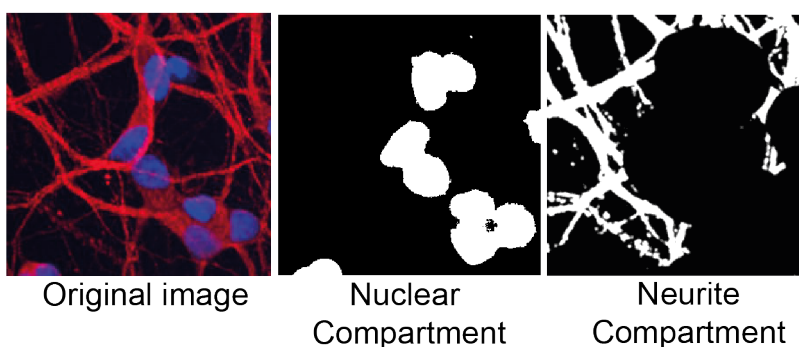

**Supplementary Figure 1. Example images of the neuronal segmentation used in the image analysis.** A) Examples of nuclear and cytoplasmic compartments used in the nuclear:cytoplasmic ratio analysis. The nuclear:cytoplasmic ratio is calculated per cell. B) Example of the nuclear and neurite compartments used in the nuclear:neurite ratio analysis. The nuclear:neurite ratio is calculated per field of view.

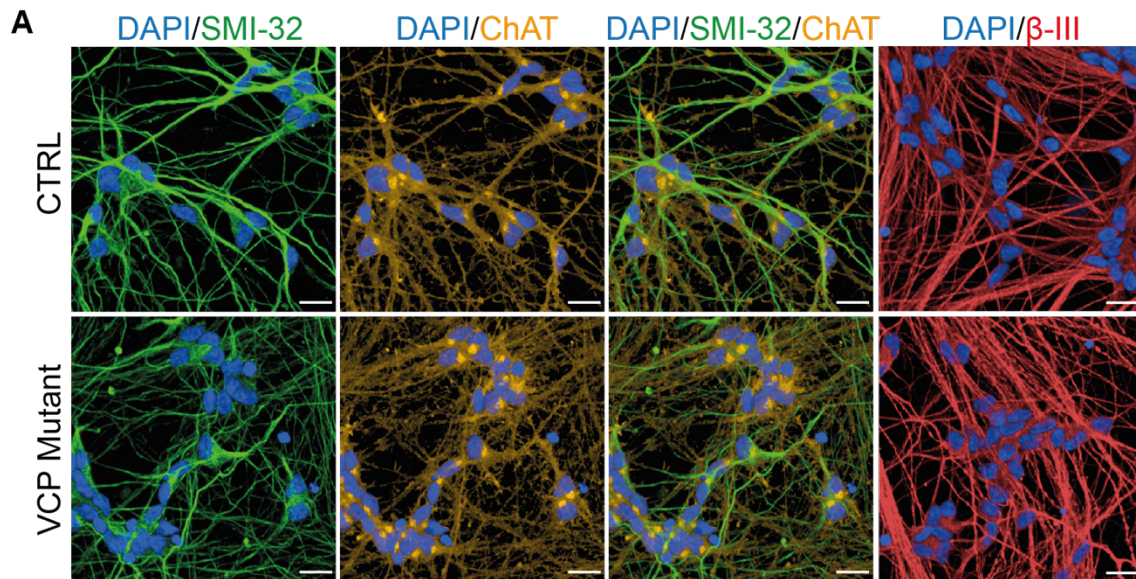

**Supplementary Figure 2. Motor neuron characterisation.** Representative images of control and VCP mutant iPSC-derived motor neurons, immunolabeled with motor neuron specific markers SMI-32 and ChAT and neuronal marker  $\beta$ III-tubulin. Scale bar = 20 $\mu$ m.

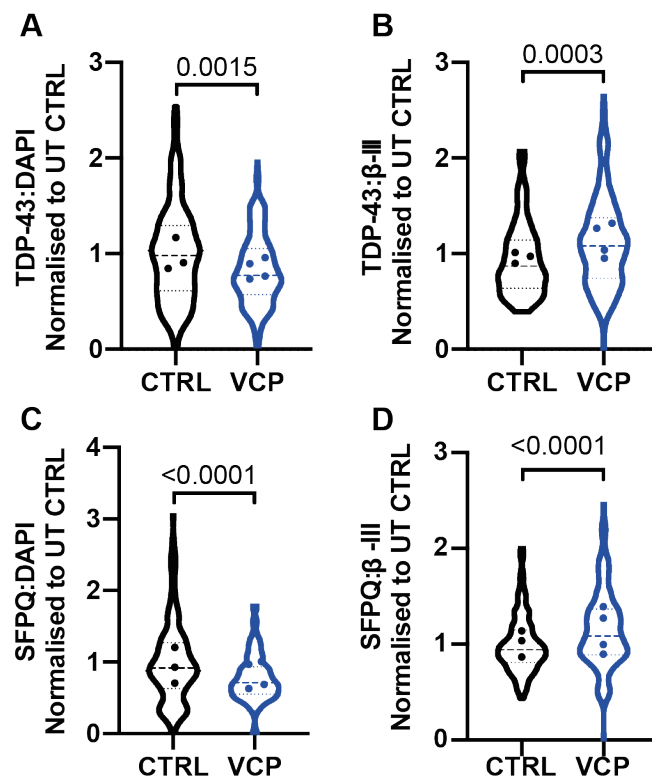

**Supplementary Figure 3. Compartmental analysis of TDP-43 and FUS in VCP mutant motor neurons.** A) Nuclear compartmental analysis shows VCP mutant motor neurons have a loss of TDP-43 in the nucleus when compared to DAPI. B) Neurite compartmental analysis shows VCP mutant motor neurons have a gain of TDP-43 in the neuronal process when compared to neuronal marker  $\beta$ III-tubulin. C) Compartmental analysis shows a loss of SFPQ protein in the nucleus in VCP mutant motor neurons. D) Compartmental analysis shows a gain of SFPQ in the neurites of VCP mutant motor neurons. Data is shown as violin plots

normalised to control untreated values in each experimental repeat. Data is collected from 3 control lines and 4 VCP mutant lines from 6 wells across 3 independent experimental repeats. Data is plotted per field of view and the data points represent the mean of each cell line. The  $p$  value is calculated from a Mann-Whitney test.

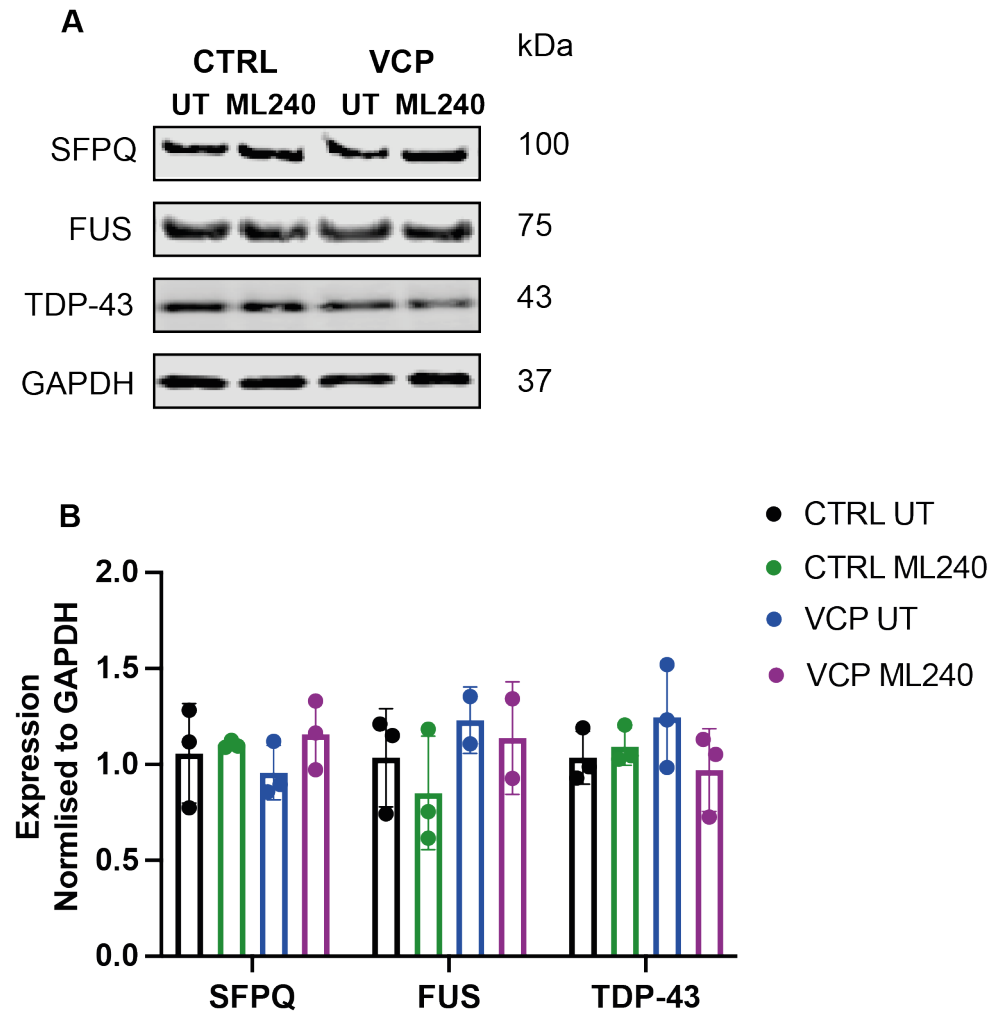

**Supplementary Figure 4. Western blot analysis shows TDP-43, FUS and SFPQ protein levels do not change upon inhibition of VCP D2 ATPase domain.** A) Representative immunoblot of SFPQ, FUS and TDP-43 in control and VCP mutant MNs untreated and treated with ML240 1 $\mu$ M. B) Quantification of SFPQ, FUS and TDP-43 from 3 control and 3 VCP mutant lines normalised to GAPDH showed ML240 treatment does not change overall protein levels.

## Supplementary Methods

### Motor neuron differentiation

IPSC were plated to 100% confluency and then differentiated to the neuroepithelium in medium consisting of DMEM/F12 Glutamax, Neurobasal, L-Glutamine, N2 supplement, nonessential amino acids, B27 supplement,  $\beta$ -mercaptoethanol (all from Life Technologies) and insulin (Sigma). The cells underwent a sequential treatment with small molecules, with day 0-7: 1 $\mu$ M Dorsomorphin (Millipore), 2 $\mu$ M SB431542 (Tocris Bioscience), and 3.3 $\mu$ M CHIR99021 (Miltenyi Biotec), day 7-14: 0.5 $\mu$ M retinoic acid (Sigma) and 1 $\mu$ M Purmorphamine (Sigma), day 14-18: 0.1 $\mu$ M Purmorphamine. Following 18 days of neural conversion and patterning, neural precursors were terminally differentiated in 0.1 $\mu$ M Compound E (Enzo Life Sciences). Throughout the neuroepithelial layer was enzymatically dissociated using dispase (GIBCO, 1 mg ml<sup>-1</sup>). The neural precursors were dissociated with Accutase (Life Technologies) for final plating onto a 96 well plate (Falcon) coated with polyethylenimine (PEI) (2.2mg/ml in 0.1M of sodium borate (Sigma) and Geltrex. Following 6 days of terminal differentiation, cells were fixed in 4% paraformaldehyde for immunolabeling.
